# Supplementary material for: CCR7 defines a precursor for murine iNKT cells in thymus and periphery
Source: eLife. 2018 Aug 13;7:e34793. doi: 10.7554/eLife.34793 (PMC6115192; doi:10.7554/eLife.34793)
Supplement: Figure 1—source data 1. [file elife-34793-fig1-data1.xlsx]

## Sheet: Sheet1
	Figure 1-source data 1 High proliferative and precursor potential of CCR7+ iNKT cells
	Figure 1D
	Stage 0 iNKT	CCR7+ NKTp	IL-4+ NKT2	NKT17	NKT1
	6.9	75.7	37.9	34.9	9.62
	6.88	78.7	40.9	28.8	9.6
	14.3	71.2	32.6	22.1	15.5
	7.96	73.8	41.4	31.1	8.49
	7.89	70.5	42.8	34.1	7.71
	9.49	71.1	42.8	29.1	8.66
	6.06	69.9	38	32.6	8.4
	Figure 1F
	T-betGFP+
	Pre-transfer CCR7+ iNKT	5d Post-tranafer CCR7+ iNKT
	0	4.91
	0	9.6
	0	9.44
	0	15.85
	0	13.96
	ROR-γt+
	Pre-transfer CCR7+ iNKT	5d Post-tranafer CCR7+ iNKT
	0	22.79
	0.4	27.44
	0.4	26.14
	0	29.25
	0.67	16.78
	0.14	15.85
	0	23.86
	0.25	17.5
	0	5.78
	0	25.4
	huCD2+
	Pre-transfer CCR7+ iNKT	5d Post-tranafer CCR7+ iNKT
	0	24.2
	0	10.2
	0	15
	0	29.1
	0	23.8
