# Supplementary material for: CCR7 defines a precursor for murine iNKT cells in thymus and periphery
Source: eLife. 2018 Aug 13;7:e34793. doi: 10.7554/eLife.34793 (PMC6115192; doi:10.7554/eLife.34793)
Supplement: Figure 1—source data 2. [file elife-34793-fig1-data2.xlsx]

## Sheet: Sheet1
	sFigure 2-source data 1 Thymic CCR7+ iNKT cells are distinguished from stage 0 iNKT cells and give rise to iNKT subsets in periphery
	sFigure 2E
	Stage 0 iNKT	CCR7+ iNKT
	3.56036	0.541486
	4.07536	0.486736
	3.19026	0.577528
	4.15539	0.680297
	sFigure 2G
	T-betGFP+
	Pre-transfer CCR7+ iNKT	5d Post-tranafer CCR7+ iNKT
	0	19.91
	0	15.6
	0	5.2
	0	15.03
	ROR-γt+
	Pre-transfer CCR7+ iNKT	5d Post-tranafer CCR7+ iNKT
	0	6.73
	0	17.18
	0	8.22
	huCD2+
	Pre-transfer CCR7+ iNKT	5d Post-tranafer CCR7+ iNKT
	0	3.85
	0	8.94
	0	7.98
