# Supplementary material for: CCR7 defines a precursor for murine iNKT cells in thymus and periphery
Source: eLife. 2018 Aug 13;7:e34793. doi: 10.7554/eLife.34793 (PMC6115192; doi:10.7554/eLife.34793)
Supplement: Figure 2—source data 1. [file elife-34793-fig2-data1.xlsx]

## Sheet: Sheet1
	Figure 2-source data 1 RTE iNKT cells are CCR7+ and depends on Klf2 for emigration
	Figure 2B Bottom
	Thymic iNKT	Splenic RTE iNKT	Splenic Old iNKT
	6.51	50.2	19
	8.93	39.4	16.5
	6.22	45.9	18.2
	8.28	33.4	21.5
	9.73	50.3	28.1
	4.23	35.2	16
	3.16	42.8	19.7
	2.37	31.3	12.6
	2.94	41.1	14.1
	5.07	38.7	17.4
	6.49	36.9	20.3
	8.07	36.5	16.1
	4.83	45.4	27
	4.92	35.8	8.65
	3.94	38.8	7.18
	2.73	42.4	14
	2.77	47.3	10.9
	3.36	49.2	17.4
	2.35	44	14.1
	3.69	49	15.1
	4.17	48	16.6
	5.37	37.6	13.4
	5.25	41.5	16.3
	Figure 2D Top
	Thymic CD4	RTE CD4	Old CD4	Thymic CD8	RTE CD8	Old CD8	Thymic iNKT	RTE iNKT	Old iNKT
	0.490909	0.00419501	0.00243902	0.96994	0	0.00132802	7.55963	0.196102	0.192246
	0.430014	0.0065442	0.0104539	1.59474	0.00287611	0.00723781	13.597	0.0932522	0.40246
	0.374302	0.00420673	0.00403646	0.649832	0	0.000904523	7.45536	0.133787	0.44464
	0.451327	0.00344418	0.00529172	1.25858	0.000647249	0.00240202	10.3245	0.0545064	0.236025
	0.409742	0.00307329	0.00263505	0.79562	0.00272035	0.0018226	7.76577	0.166259	0.204678
	0.410999	0.00144753	0.00402219	1.06962	0.000639731	0.00157895	9.00929	0.103413	0.269231
	Figure 2D Bottom
	Thymic CD4	RTE CD4	Old CD4	Thymic CD8	RTE CD8	Old CD8	Thymic iNKT	RTE iNKT	Old iNKT
	0.603896	0.46997	0.612963	0.521472	0.496195	0.714286	0.75	0.753153	0.722338
	0.599676	0.586093	0.653923	0.600644	0.744144	0.727642	0.693252	0.773551	0.606343
	0.536434	0.409956	0.51577	0.447674	0.473364	0.581818	0.614604	0.424242	0.549632
	0.734622	0.931313	0.843678	0.847866	1.01867	0.959716	1.06633	1.35181	0.925508
	0.326586	0.362193	0.403624	0.341892	0.326116	0.384095	0.506903	0.341997	0.444846
	0.181601	0.224619	0.552876	0.202899	0.283837	0.575701	0.926702	0.54323	0.625255
	0.558176	0.602041	0.377551	0.543344	0.536164	0.362438	0.575964	0.539075	0.364548
	0.342391	0.492038	0.596117	0.380886	0.491729	0.567829	0.914842	0.572581	0.609195
	Figure 2E Bottom
	CCR7+ iNKT	CCR7- iNKT	Stage 0 iNKT
	1.09677	0.532258	0.435484
	1.03571	0.485119	0.366071
	0.993902	0.454268	0.378049
	1.00604	0.456193	0.365559
