# Supplementary material for: CCR7 defines a precursor for murine iNKT cells in thymus and periphery
Source: eLife. 2018 Aug 13;7:e34793. doi: 10.7554/eLife.34793 (PMC6115192; doi:10.7554/eLife.34793)
Supplement: Figure 2—source data 2. [file elife-34793-fig2-data2.xlsx]

## Sheet: Sheet1
	sFigure 4-source data 1 RTE iNKT and CCR7+ RTE iNKT cells are Rag2GFP+
	sFigure 4C
	RTE iNKT	Old iNKT
	1.56497	0.99435
	1.57865	0.938202
	1.21463	0.863415
	1.48259	0.855721
	1.01145	0.782443
	1.04706	0.827451
	sFigure 4D
	CCR7+ RTE iNKT	CCR7- RTE iNKT
	2.56497	0.99435
	2.23596	1.16854
	1.69756	0.853659
	2.1194	0.99005
	1.3626	0.683206
	1.47843	0.647059
