# Supplementary material for: CCR7 defines a precursor for murine iNKT cells in thymus and periphery
Source: eLife. 2018 Aug 13;7:e34793. doi: 10.7554/eLife.34793 (PMC6115192; doi:10.7554/eLife.34793)
Supplement: Figure 2—source data 3. [file elife-34793-fig2-data3.xlsx]

## Sheet: Sheet1
	sFigure 5-source data 1 High Klf2GFP in RTE iNKT cells
	sFigure 5A
	RTE iNKT	Old iNKT
	0.897912	0.556844
	0.932836	0.656716
	0.985148	0.660891
	0.855856	0.545045
	1.04662	0.582751
	1.1005	0.638191
