# Supplementary material for: CCR7 defines a precursor for murine iNKT cells in thymus and periphery
Source: eLife. 2018 Aug 13;7:e34793. doi: 10.7554/eLife.34793 (PMC6115192; doi:10.7554/eLife.34793)
Supplement: Figure 3—source data 1. [file elife-34793-fig3-data1.xlsx]

## Sheet: Sheet1
	Figure 3-source data 1 RTE iNKT cells are immaturea and mature further in periphery
	Figure 3B
	Left: T-bet+ NKT1			Middle: ROR-𝛄t+ NKT17			Right: IL-4 (huCD2) gMFI
	Thymic iNKT	RTE iNKT	Old iNKT	Thymic iNKT	RTE iNKT	Old iNKT	Thymic iNKT	RTE iNKT	Old iNKT
	30.2	5.3	29.1	25.6	2.65	0.65	46.7917	23.4982	32.8378
	32.3	3.5	19.9	16.5	2.12	1.23	43.1325	25.1456	34.5213
	32	9.23	23.7	13.5	3.78	2.29	35.0282	21.9694	30.7862
	30	9.03	26.7	29.3	5.1	2.5	51.9335	27.2673	39.8465
	47.7	6.8	39.2	15.2	5.55	2.53	59.1925	32.5443	41.5691
	26	9.69	41	29.1	3.13	1.1	63.3838	28.2068	39.9774
	26	0.92	46.2	18.7	0.92	0.77	50.3185	27.6795	41.934
	22.6	3.09	35.9	19.1	2.22	1.45
	25.2	2.3	31.6	19.8	2.08	1.09
	25.9	2.6	39.1	21.6	2.32	0.92
	27.7	3	36.3	19.2	2.42	0.76
	23.7	1.96	34	17.6	1.41	0.84
	Figure 3D
	Left: Qa2 gMFI
	24h RTE iNKT	72h RTE iNKT	Old iNKT	Thymic iNKT
	0.207685	0.362656	0.828845	0.814422
	0.183517	0.483668	0.795642	0.712513
	0.187184	0.607894	0.868009	0.76541
	0.212546	0.294462	0.813877	0.772666
	0.152654	0.29001	0.843272	0.658376
	0.150818	0.38018	0.80714	0.78871
	0.154242	0.370317	0.80443	0.712975
		0.380985	0.963713	0.700882
		0.426053	0.990949
			1.00699
			0.895634
			0.966912
			0.879981
			1.00667
			0.983513
	Right: PLZF gMFI
	24h RTE iNKT	72h RTE iNKT	Old iNKT	Thymic iNKT
	39.5129	16.8293	15.702	13.7393
	38.2229	19.8319	15.7405	13.7095
	40.8827	20.6122	15.7049	14.2029
		17.8151	15.0449	11.4763
			17.2689	15.5462
			16.5714	12.2857
			16.2745	11.0649
				14.0056
