# Supplementary material for: CCR7 defines a precursor for murine iNKT cells in thymus and periphery
Source: eLife. 2018 Aug 13;7:e34793. doi: 10.7554/eLife.34793 (PMC6115192; doi:10.7554/eLife.34793)
Supplement: Figure 3—source data 2. [file elife-34793-fig3-data2.xlsx]

## Sheet: Sheet1
	sFigure 6-source data 1 Thymic CCR7+ iNKT cells emigrate to periphery and differentiate into effector subsets
	sFigure 6C
	% of T-betGFP+
	Pre-transfer CCR7+ iNKT	5d Post-tranafer CCR7+ iNKT
	0	6.61
	0	15.6
	0	9.74
	0	19.9
	0	12.89
	% of ROR-γt+
	Pre-transfer CCR7+ iNKT	5d Post-tranafer CCR7+ iNKT
	0	2.96
	0.4	3.12
	0.4	0.57
	0	0.88
	0.67	2.62
	0.14	3.7
	0	1.15
	0.25	6.62
	0	6.62
	0	4.55
	% of huCD2+
	Pre-transfer CCR7+ iNKT	5d Post-tranafer CCR7+ iNKT
	0	7.39
	0	4.39
	0	7.41
	0	11.07
	0	2.27
