# Supplementary material for: CCR7 defines a precursor for murine iNKT cells in thymus and periphery
Source: eLife. 2018 Aug 13;7:e34793. doi: 10.7554/eLife.34793 (PMC6115192; doi:10.7554/eLife.34793)
Supplement: Figure 4—source data 1. [file elife-34793-fig4-data1.xlsx]

## Sheet: Sheet1
	Figure 4-source data 1 CCR7 plays important role in iNKT cells differentiation and localization
	Figure 4B
	Wt/Wt_DP	CCR7 KO/Wt_DP	Wt/Wt_NKT1	CCR7 KO/Wt_NKT1	Wt/Wt_PLZFhi	CCR7 KO/Wt_PLZFhi	Wt/Wt_NKT17	CCR7 KO/Wt_NKT17
	1.51637	0.930502	1.68987	0.372134	3.83092	0.358696	3.15678	0.0333333
	1.00803	0.485884	1.36593	0.800813	1.7248	0.193317	2.80469	0.25
	0.353659	0.856877	2.67033	0.138562	1.88439	0.223039	2.68846	0.0571882
	0.834862	0.703578	0.800857	0.281859	1.36493	0.344086	1.17865	0.102536
	1.28833	0.811594	1.0654	0.437247	2.71747	0.515244	1.26157	0.231527
	0.986083	0.383657	1.21493	0.47193	0.779359	0.212121	0.545595	0.0714898
	0.48368	0.650165	0.921717	0.560976	1.59115	0.293661	2.60577	0.213592
	0.758803	0.678992	1.53055	0.338182	1.40964	0.464129	2.367	0.105193
	0.616505	0.506787	1.06158	0.363977	1.03666	0.246558	1.5	0.148106
	1.12553	0.565831	1.15929	0.800952	1.80112	0.289235	3.36681	0.142857
	Figure 4F
	Left		Right
	CD45.1+ Wt	CD45.1- CCR7 KO	CD45.1+ Wt	CD45.1- Wt
	82.35	41.6	75.8	62.163
	73.8307	70.7	78.5	75.343
	70.9053	50.7	60.5	65.107
	73.9053	70.5	76.6	62.236
	69.55	62.7	65.8	59.131
	69.896	50.6
