# Supplementary material for: CCR7 defines a precursor for murine iNKT cells in thymus and periphery
Source: eLife. 2018 Aug 13;7:e34793. doi: 10.7554/eLife.34793 (PMC6115192; doi:10.7554/eLife.34793)
Supplement: Figure 4—source data 2. [file elife-34793-fig4-data2.xlsx]

## Sheet: Sheet1
	sFigure 7-source data 1 CCR7 plays important role in MAIT cells differentiation
	sFigure 7C
	Wt/Wt_DP	CCR7 KO/Wt_DP	Wt/Wt_ROR-rt+ MAIT	CCR7 KO/Wt_ROR-rt+ MAIT	Wt/Wt_T-bet+ MAIT	CCR7 KO/Wt_T-bet+ MAIT
	1.39682	1.20339	1.24699	0.178412	1	0.356522
	1.17192	2.8	1.20571	0.767943	1.32298	0.228
	1.59928	2.26587	0.753623	0.237875	1.53548	0.271408
	1.1076	1.1076	1.94314	0.208437	0.975248	0.423242
	1.50923	1.36407	0.932347	0.123138	1.29073	0.265823
	1.43667	0.851852	1.87898	0.301095	1.49242	0.468697
