# Supplementary material for: CCR7 defines a precursor for murine iNKT cells in thymus and periphery
Source: eLife. 2018 Aug 13;7:e34793. doi: 10.7554/eLife.34793 (PMC6115192; doi:10.7554/eLife.34793)
Supplement: Figure 5—source data 1. [file elife-34793-fig5-data1.xlsx]

## Sheet: Sheet1
	Figure 5-source data 1 Thymic iNKT cells are resident and influence thymic microenvironment
	Figure 5C
	Splenic CD4 T cells	Splenic CD8 T cells	Splenic iNKT	Thymic iNKT
	47.5	46.9	90	99.9
	61.3	53.5	92	100
	46.1	48	78.7	99.9
	61.9	54.1	80.6	99.8
	78.1	61	82.2	100
	25.6	37.8	76.8	99.4
	43.2	47.3	75	99.8
	62.5	53.4	79.7	99.7
	56.4	51	92.6	99.9
	48.1	46.6	85.1	100
	79.4	68.9	84	99.9
	27.5	30.4	71.1	99.9
	Figure 5E
	Donor-derivedThymic CCR7+ iNKT	Donor-derived Splenic CCR7+ iNKT	Donor-derived Thymic T-betGFP+ iNKT	Donor-derived Splenic T-betGFP+ iNKT
	3357.03	3036	6289.29	166.593
	3214.11	787.168	6279.49	90.2481
	2462.62	1351.4	5284.92	151.337
	8293.58	2295.19	8170.13	257.847
	1013.07	834.803	4586.5	321.877
	Figure 5G
	YFP+% of NKT1
	53.7
	61.2
	62
	62.1
	58.2
	57.6
	61.5
	58.9
	55.2
	58.8
	54.4
	43.6
	43.6
	42.3
	44.2
	45.2
	43.9
	Figure 5I
	Left			Right
	Wt CD4 SP	CD1d KO CD4 SP	IFN-g R CD4 SP	Wt CD8 SP	CD1d KO CD8 SP	IFN-g R CD8 SP
	30.6	26.8	12.6	70.6	60	44.8
	31.3	25	17	71.8	58.6	67.4
	31.3	28.3	21.8	74.9	66	66.8
	29.9	15.7	19.5	66.2	43.4	66.9
	35.1	23.2	18	70.8	50.5	66.6
	41.1	23.5	19.8	69.1	68.3	71.7
	30.8	20.9		73.3	64.5
	25.1	23.5		69.4	66.2
	37	16		71.8	65.7
	31.9	17.6		74.3	72.2
	23.6	17.7		50.9	68
	35.7			81.7
	33.3			77.5
	35.4			80.4
	24.8			76.2
	30			80.6
	29.8			76.2
	38.9			77.9
	Figure 5J
	NKT1	NKT2	NKT17
	1.22995	2.18182	1.82353
	1.22346	2.25698	1.99441
	1.17259	2.13706	1.96954
	1.60497	4.47514	3.59116
	1.42905	4.86486	3.81757
	1.63466	2.69311	2.27557
	1.56427	2.81046	2.11547
	Figure 5L
	% of Aire+ mTEC		# of Aire+ mTEC		# of Total TEC
	Wt	CD1d KO	Wt Aire+ mTEC	CD1d KO Aire+ mTEC	Wt total TEC	CD1d KO TEC
	28.06	19.72	272410	162764	951275	813819
	25	17.4	198650	155939	662165	896647
	25	15.5	213144	173233	659730	725161
	28.7	18.8	198598	131578	678139	696590
	27.1	17.9	192249	144321	727430	797565
		14.3		102834		725886
