# Supplementary material for: CCR7 defines a precursor for murine iNKT cells in thymus and periphery
Source: eLife. 2018 Aug 13;7:e34793. doi: 10.7554/eLife.34793 (PMC6115192; doi:10.7554/eLife.34793)
Supplement: Figure 5—source data 2. [file elife-34793-fig5-data2.xlsx]

## Sheet: Sheet1
	sFigure 8-source data 1 CD69 and CD103 are dispensable for thymic retention of NKT1 and NKT17 cells
	sFigure 8C
	Thymus			Spleen
	Wt Thymic NKT1	CD69+/- Thymic NKT1	CD69 -/- Thymic NKT1	Wt Splenic NKT1	CD69+/- Splenic NKT1	CD69-/- Splenic NKT1
	521037	385472	564415	673154	308483	391497
	616886	468183	439095	520363	407008	471216
	454453	459702	330784	700132	325105	241138
	462203	451638	289053	526419	326033	229746
	393935	229948		240756	257897
	372132			231780
	sFigure 8F
	Thymic NKT17_Isotype	Thymic NKT17_Blocking	RTE NKT17_Isotype	RTE NKT17_Blocking	Old NKT17_Isotype	Old NKT17_Blocking
	16.5	17.9	3.33	4.28	0.78	1.75
	29.2	27	3.13	3.6	0.76	1.26
	18.7	23	3.19	3.62	0.65	1.39
	24	34.8	5.62	3.73	1.15	0.65
	20.2	22.7	1.38	1.44	0.49	0.77
	11	23	0.97	2.68	0.63	1.41
	24.6		1.43		1.63
